# Supplementary material for: Population genetics and lineage structure of the endangered Bolivian chinchilla rat Abrocoma boliviensis
Source: Research Square preprint supplement (doi:10.21203/rs.3.rs-6513653/v1), 2025-05-05
Supplement: Supplementary file 1 [file 0132eabf138aab9838ddf66d.docx]

Title: Population genetics and lineage structure of the endangered Bolivian chinchilla rat *Abrocoma boliviensis*

Journal: Conservation Genetics

Authors: Daniela Arenas-Viveros*, Teresa Tarifa, Marisol Hidalgo-Cossio, Omar F. Osco, Ximena Velez-Liendo, and Jorge Salazar-Bravo.

*Department of Biological Sciences, Texas Tech University, Lubbock, TX, USA, and Department of Forest and Wildlife Ecology, University of Wisconsin, Madison, WI, USA, [danielaarenas954@gmail.com](mailto:danielaarenas954@gmail.com)

**Table S1.** Specimens sequenced in this study except for those marked with * whose sequences were downloaded from GenBank. **CBF** = Colección Boliviana de Fauna, Universidad Mayor de San Andrés, Bolivia; **CBG** = Centro de Biodiversidad y Genética, Universidad Mayor de San Simón, Cochabamba, Bolivia; **MHNC-M** =Museo de Historia Natural Alcide d'Orbigny de Cochabamba, Bolivia; **MNK** = Museo de Historia Natural Noel Kempff Mercado, Santa Cruz, Bolivia; **MVZ** = Museum of Vertebrate Zoology, University of California; **MUSA** = Museo de la Universidad Nacional San Agustín de Arequipa, Perú; **OCGR** = Sam Noble Museum, The University of Oklahoma; **TK** = Natural Science Research Laboratory, Texas Tech University. M = male, F = female.

| **Species** | **Catalog or GenBank accession number** | **Sex** | **Country** | **Department** | **Locality** |
| --- | --- | --- | --- | --- | --- |
| *A. boliviensis* | MVZ 120238 | F | Bolivia | Santa Cruz | 5mi W of Comarapa |
| TK 182281/CBG461 | M | Bolivia | Cochabamba | Comunidad Pajcha (Parque Nacional Tunari), Km 15 |
| TK 161712/CBG390 | F | Bolivia | Santa Cruz | Florida, Mairana, La Yunga Parque Nacional Amboro AMNI cerca de Mairana |
| TK 161714 | ? | Bolivia | Santa Cruz | Mairana |
| TK 161717 | F | Bolivia | Cochabamba | Arque, Pusuq'huni |
| TK 161718 | M | Bolivia | Cochabamba | Arque, Pusuq'huni |
| TK 161720 | F | Bolivia | Cochabamba | Mizque, Sach'a Loma |
| TK 161721 | F | Bolivia | Cochabamba | Mizque, Sach'a Loma |
| MNK 3851 | M | Bolivia | Santa Cruz | subida a la cuesta de Mairana hacia la obra de Saimapata |
| MHNC-M 280 | ? | Bolivia | Potosi | Charcas, Torotoro, 3 km N of Torotoro, Parque Nacional Torotoro |
| MHNC-M 682 | M | Bolivia | Tarija | ca. 5 km S Villa Esperanza |
| CBF 5455 | F | Bolivia | Cochabamba | Ayopaya, Sailapata |
| *A. cinerea* | MUSA 5759 | F | Peru | Arequipa | Arequipa, Chiguata, El Simbral, bosque de queñuas |
| MUSA 9538 | M | Peru | Tacna | Tacna, Palca, Alto Perú, Tripartito |
| MUSA 12453 | F | Peru | Tacna | Tacna, Palca, Laguna Blanca, Alto Perú |
| MUSA 12439 | F | Peru | Tacna | Tacna, Palca, Laguna Blanca, Alto Perú |
| OCGR 7349 | ? | Argentina | Jujuy | Jujuy, Susques, 12.3 km N, 11.5 km W San Antonio de los Cobres (by road) |
| OCGR 3744 | ? | Argentina | Salta | Salta, Los Andes, Vega Coradera |
| CBF 4456 | ? | Bolivia | La Paz | Alrededores de la ciudad de La Paz |
| CBF 10665 | ? | Bolivia | Potosi | Sud Lipez, Laguna Khumo |
| AF244388* | ? | Chile |  | Talabre II region |

**Table S2.** PCR cycling conditions for primer pairs. Unless otherwise specified: **Initial hold** was at 94°C for 3min, **denaturation** at 94°C for 45s, **extension** at 72°C for 1min 30s and **final extension** at 72°C for 5 min. a Low-quality sample (skin, ear, feces, and fingers). * PCR products submitted to another 15 cycles at 46°C annealing temperature. Sources and details for most of these primers are well described in (Upham et al. 2013).

| **Primer combo (RAG1)** | **Fragment length (bp)** | **Cycling conditions** |
| --- | --- | --- |
| FMNH3a/R2864 | ~400 | Initial hold at 95°C for 5min; denaturation at 95°C for 1min; Annealing at 56°C for 1min; final extension at 72°C for 10min [45 cycles] |
| F1705/FMNH2b | ~700 |
| **Primer combo (vWF)** |  |  |
| V2/W1 | ~900 | Initial hold at 95°C for 3min; denaturation at 95°C for 45s; Annealing at 63°C, 61°C, 59°C, 57°C each for 45s [5 cycles] and 55°C [15cycles]; final extension at 72°C for 10min |
| V10/W13 | ~500 |
| **Primer combo (GHR)** |  |  |
| GHR11/15 | ~525 | Initial hold at 95°C for 3min; denaturation at 95°C for 45s; Annealing at 61°C, 59°C, 57°C, 55°C each for 45s [5 cycles] and 53°C [15cycles]; final extension at 72 for 10min |
| GHR10F/14R | ~450 |
| **Primer combo (*Cyt-b*)** |  |  |
| aCB1-5'/CB2-3' | ~400 | Annealing at 56°C for 45s [35 cycles] |
| L14724/H15915* | 1189 | Annealing at 56°C for 45s [45 cycles] |
| L14724/MVZ16* | ~800 | Initial hold at 94°C for5 min; Annealing at 50°C [20 cycles], 48°C [15 cycles] and 56°C [5 cycles] for 45s each; extension at 72 for 1min25s |
| MVZ05/MVZ16 | ~800 | Annealing at 48°C for 45s [40cycles] |
| MUS14095/MVZ16* | ~800 | Initial hold at 94°C for 5min; Annealing at 50°C [20 cycles], 48°C [15 cycles] and 56°C [5 cycles] for 45s each; extension at 72 for 1min25s |

**Supplementary methods:**

Raw reads were first demultiplex using the *process-radtags* program implemented in Stacks v2.55. The quality of the reads was assessed using FastQC and high levels of adapter content were found in all of them. Before removing adapter sequences using fastp v0.23.2 (https://github.com/OpenGene/fastp), it was necessary to identify them using a different program. BBMap (sourceforge.net/projects/bbmap/) was utilized to identify -from a reference file- the adapters present in the reads and their frequency. Once the adapter was identified, a fasta file with its sequence was included in the fastp run so it could be trimmed from the raw files (i.e., before being demultiplexed). After doing so, the reads were no longer of the same length, which is necessary for downstream analyses in Stacks 2. Therefore, after removing the adapters, the reads were demultiplexed keeping only those of 130bp (--len-limit 130 and -t 130).

To estimate the appropriate parameter settings to include in the Stacks modules, we ran several iterations of the *denovo_map* program modifying the parameters -**m** (which determines coverage depth in the ustacks module), -**M** (which determines the number of mismatches allowed to form a stack in the ustacks module) and -**n** (which controls the number of mismatches allowed between individuals when building the catalog in cstacks). The following tests were run for *A. boliviensis* and *A. cinerea* assuming panmictic populations in each case. After every run, the number of loci and polymorphic loci were calculated. Given that the parameters *-M* and *-n* do not affect coverage depth of the samples, the first set of parameter testing was performed to identify the appropriate value of *-m*. This was done by running several iterations with *-m* values anywhere from 1 to 7, while *-M* and *-n* were kept at the default values. Since the number of loci recovered was well over 1 million in all cases, **m = 6** was selected to keep the highest number of loci while ensuring that all samples had depth values >10x (as recommended by Rochette and Catchen (2017)). Next, keeping M = n, we run iterations for values of *-M* between 1 and 7. Because the number of loci and polymorphic loci were similar at M = 3, 4 and 5, subsequent iterations of the *denovo_map* program were performed, setting *-M* to either 3, 4 or 5 and *-n* equal to either M+1 or M-1.

At this stage and using only the *populations* module, the combinations of parameter settings specified above (nine in total) were run with another filter: a minimum percentage of individuals a locus must be present in, to be processed (-r = 0.75, 0.8 and 1.0). Additionally, a VCF file was generated from each run. From the VCF files, the percentage of missing data per individual was calculated (*--missing-indv* option in VCFtools v0.1.16 (Danecek et al. 2011)) and the number of variants determined. Finally, we used the program PLINK v1.9 (<https://www.cog-genomics.org/plink/1.9/>) to run PCAs and use the resulting eigenvalues and eigenvectors as a first visualization of population structure.
